# Supplementary material for: First-principles calculations of 0D/2D GQDs–MoS2 mixed van der Waals heterojunctions for photocatalysis: a transition from type I to type II
Source: Royal Society of Chemistry journal article supplement (doi:10.1039/d1cp05448a), 2022-01-01
Supplement: d1cp05448a2.pdf [file d1cp05448a2.pdf]

**Supplementary information:**

**First-principle calculations of 0D/2D GQDs-MoS<sub>2</sub> mixed van der  
Waals heterojunctions for photocatalysis: a transition from type I to  
type II**

Li-Long Luo<sup>a</sup>, Ping-Xia Wang<sup>a</sup>, Xiang-Yan Geng<sup>a</sup>, Ying-Tao Liu<sup>a</sup>, Roberts I. Eglitis<sup>b</sup>,  
Hong-Qiang Xia<sup>a</sup>, Xiao-Yong Lai<sup>a</sup> and Xin Wang<sup>a,\*</sup>

<sup>a</sup>State Key Laboratory of High-efficiency Utilization of Coal and Green Chemical  
Engineering, National Demonstration Center for Experimental Chemistry Education,  
College of Chemistry and Chemical Engineering, Ningxia University,  
Yinchuan 750021, China

<sup>b</sup>Institute of Solid State Physics, University of Latvia, 8 Kengaraga Str., Riga LV1067,  
Latvia

E-mail addresses: wangxin@nxu.edu.cn (X. Wang)

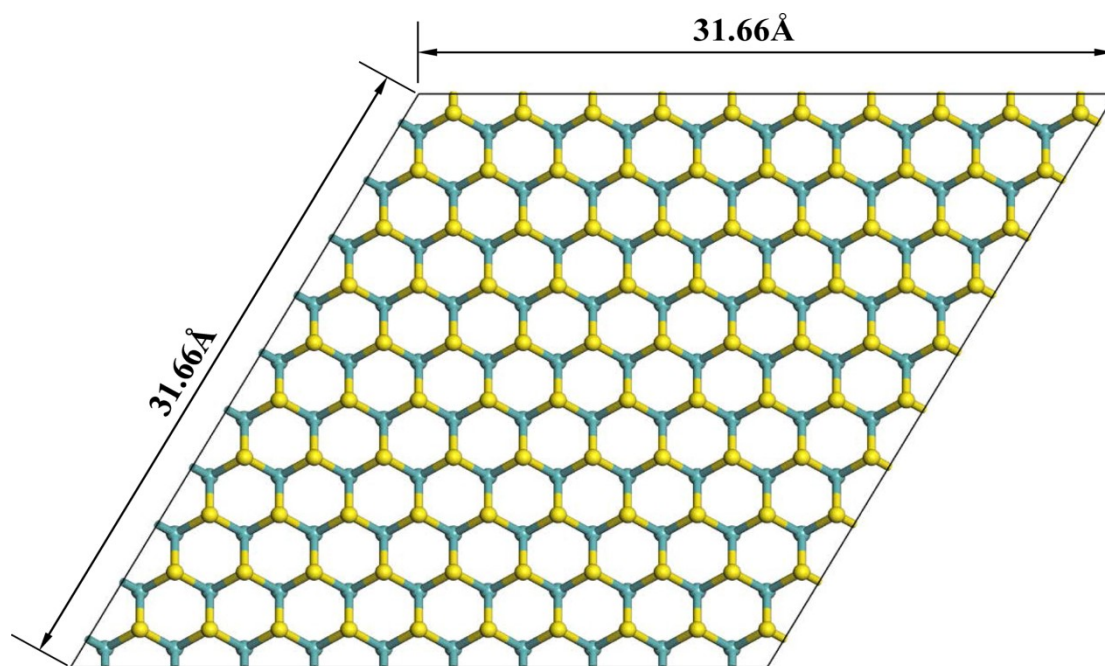

**Figure S1** Structure of MoS<sub>2</sub>.

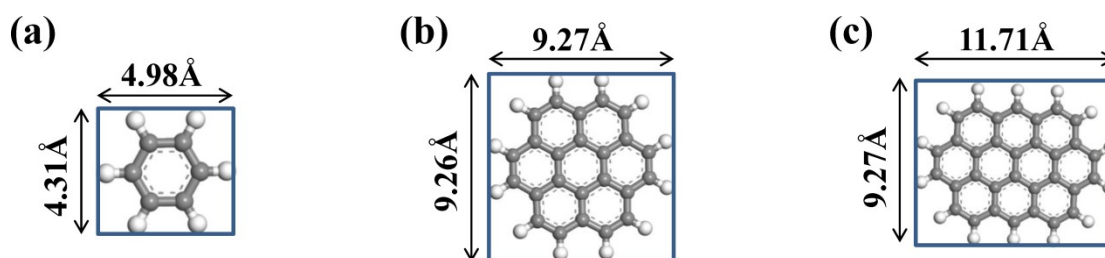

**Figure S2** Structures of (a) C<sub>6</sub>H<sub>6</sub>, (b) C<sub>24</sub>H<sub>12</sub>, and (c) C<sub>32</sub>H<sub>14</sub>.

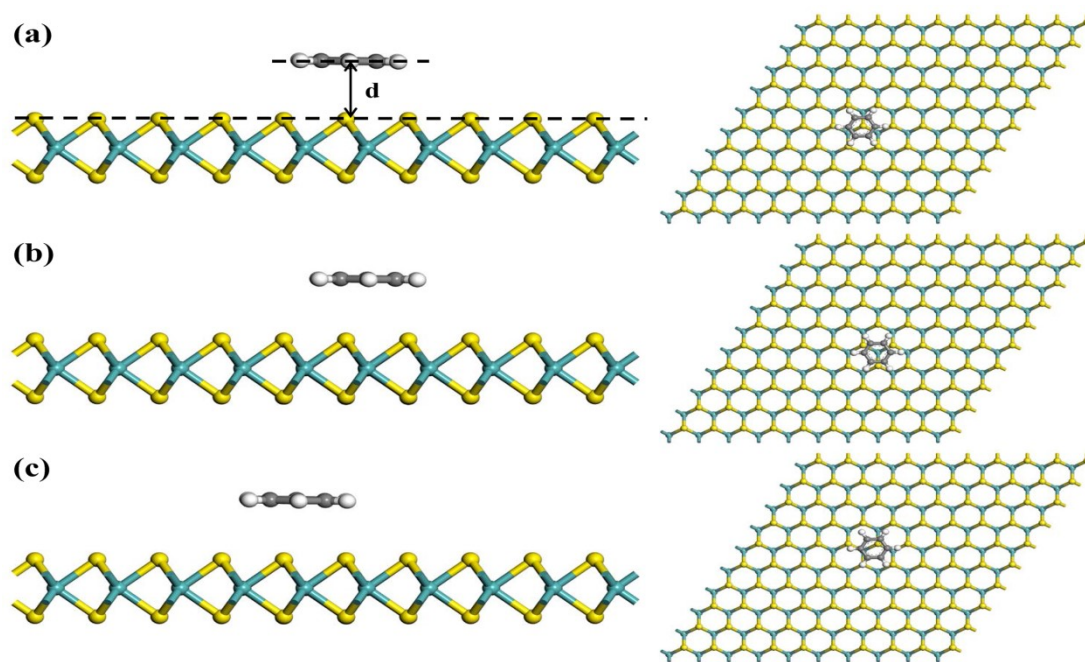

**Figure S3** Structures (top view-left and side view-right) of (a) C<sub>6</sub>H<sub>6</sub>-top, (b) C<sub>6</sub>H<sub>6</sub>-hollow, and (c) C<sub>6</sub>H<sub>6</sub>-bridge.

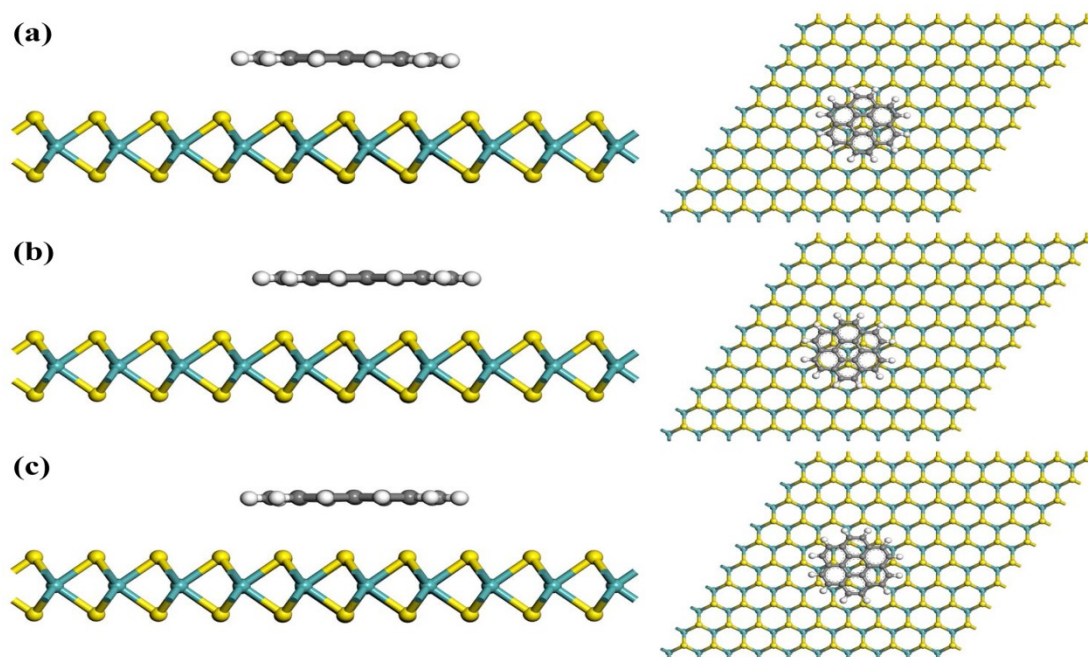

**Figure S4** Structures (top view-left and side view-right) of (a)  $C_{24}H_{12}$ -top, (b)  $C_{24}H_{12}$ -hollow, and (c)  $C_{24}H_{12}$ -bridge.

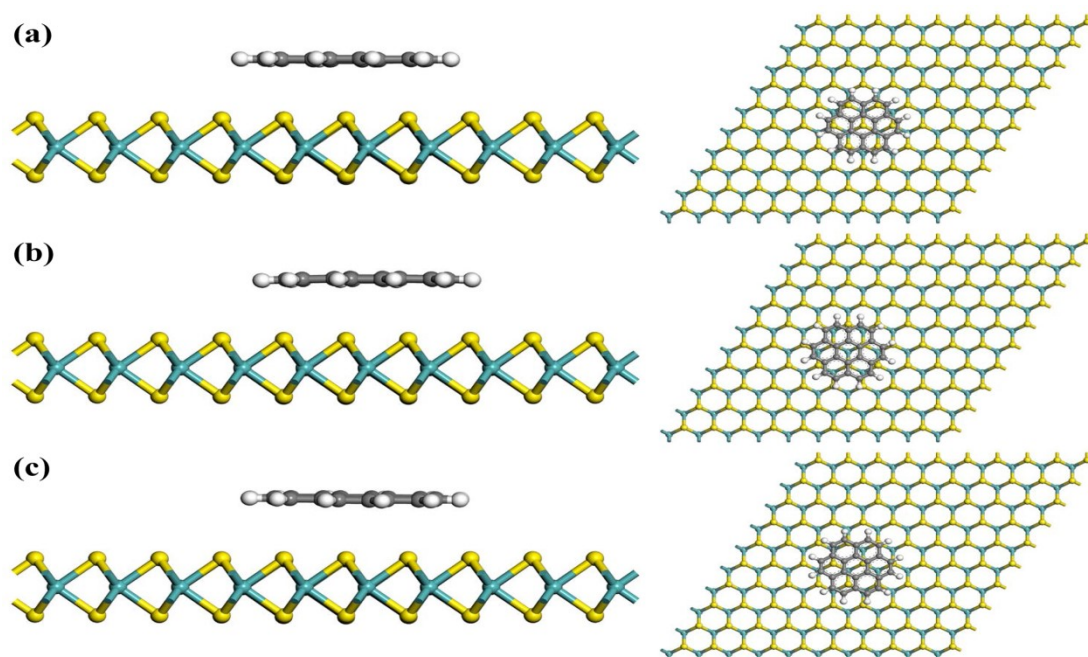

**Figure S5** Structures (top view-left and side view-right) of (a)  $C_{24}H_{12}$ -top $30^\circ$ , (b)  $C_{24}H_{12}$ -hollow $30^\circ$ , and (c)  $C_{24}H_{12}$ -bridge $30^\circ$ .

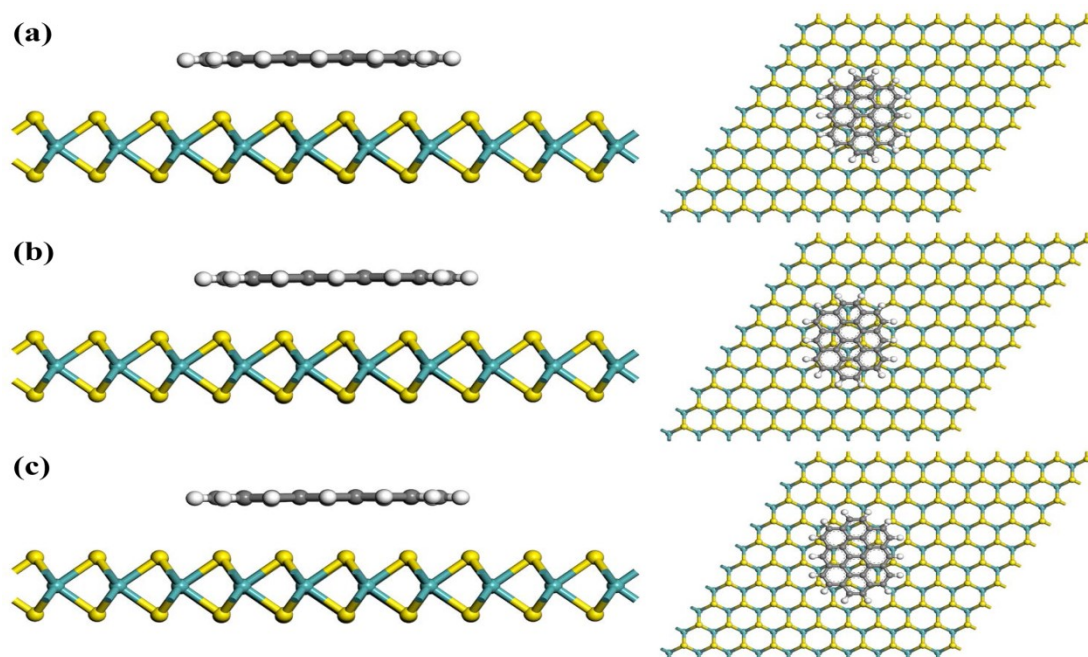

**Figure S6** Structures (top view-left and side view-right) of (a)  $C_{32}H_{14}$ -top, (b)  $C_{32}H_{14}$ -hollow, and (c)  $C_{32}H_{14}$ -bridge.

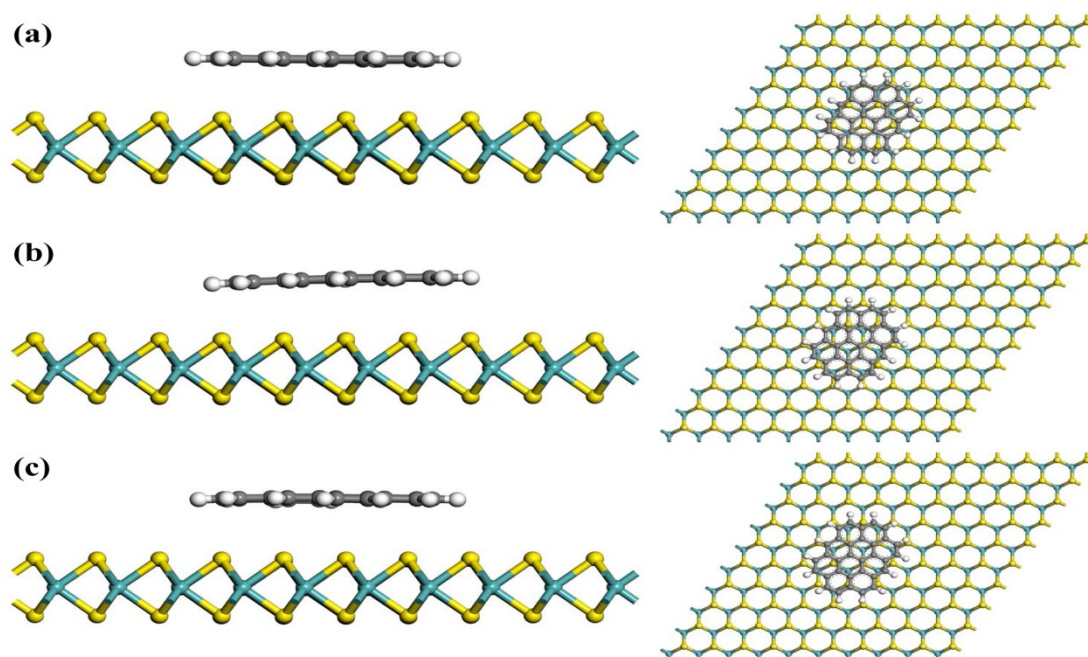

**Figure S7** Structures (top view-left and side view-right) of (a)  $C_{32}H_{14}$ -top $30^\circ$ , (b)  $C_{32}H_{14}$ -hollow $30^\circ$ , and (c)  $C_{32}H_{14}$ -bridge $30^\circ$ .

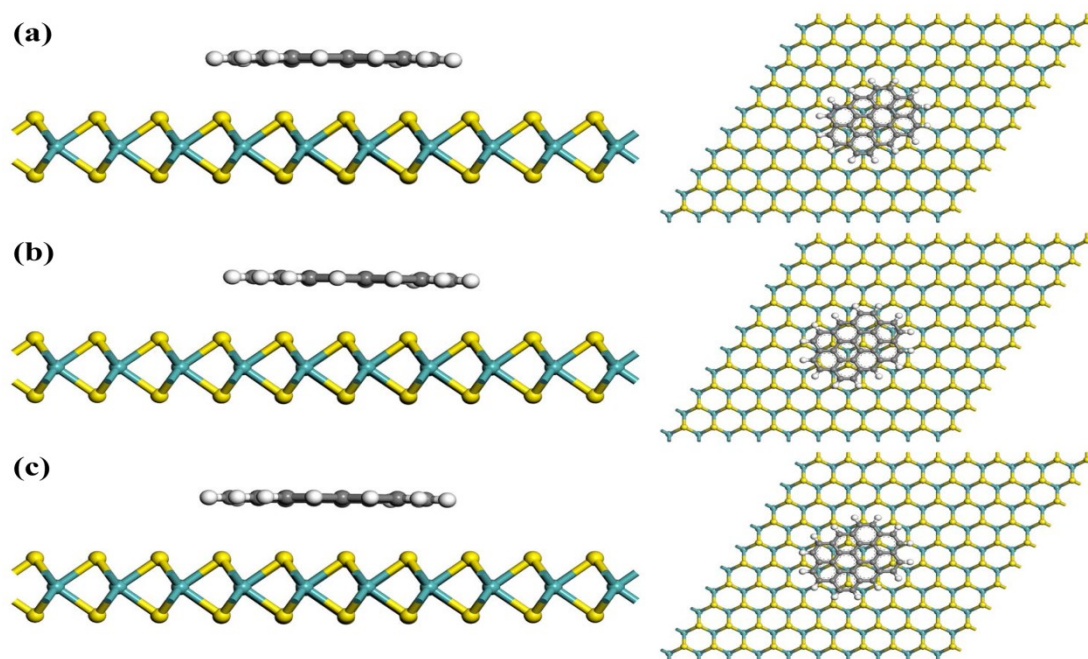

**Figure S8** Structures (top view-left and side view-right) of (a)  $C_{32}H_{14}$ -top $60^\circ$ , (b)  $C_{32}H_{14}$ -hollow $60^\circ$ , and (c)  $C_{32}H_{14}$ -bridge $60^\circ$ .

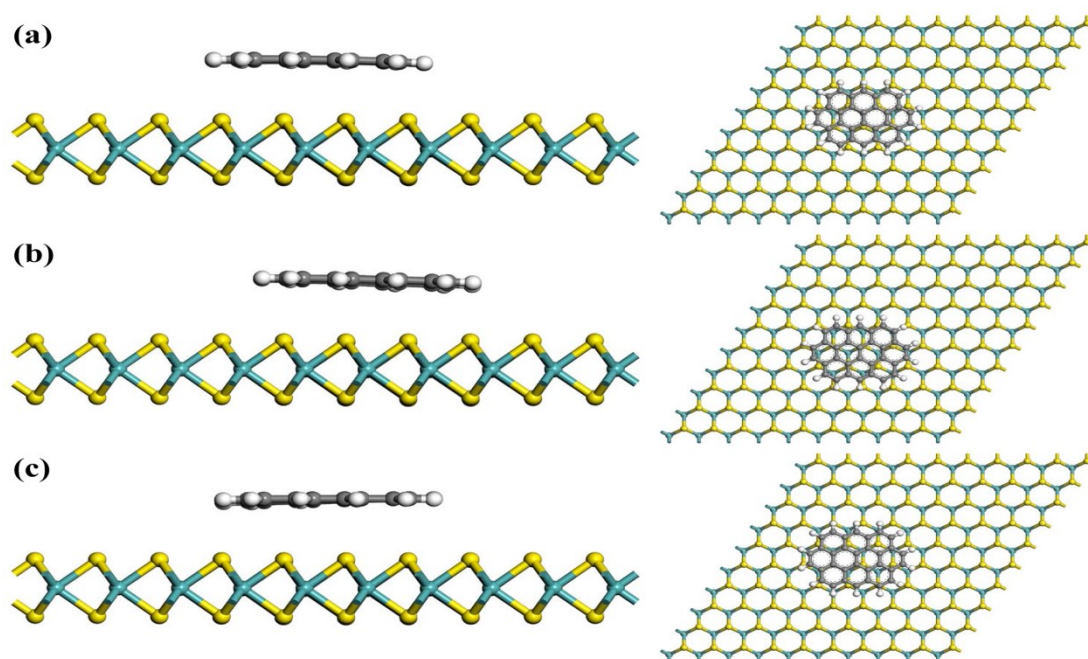

**Figure S9** Structures (top view-left and side view-right) of (a)  $C_{32}H_{14}$ -top $90^\circ$ , (b)  $C_{32}H_{14}$ -hollow $90^\circ$ , and (c)  $C_{32}H_{14}$ -bridge $90^\circ$ .

If we further increase the size of GQDs, the interaction between the adjacent GQDs cannot be avoided and the composite is no longer 0D/2D heterojunction. We can infer when the size of GQDs further increase, the conjugate effect of GQDs will be stronger. As the contact area of GQDs and MoS<sub>2</sub> increases, ultimately we can think of it as a 2D/2D graphene-MoS<sub>2</sub> heterojunction. There is much about graphene-MoS<sub>2</sub> research work.<sup>1,2</sup>

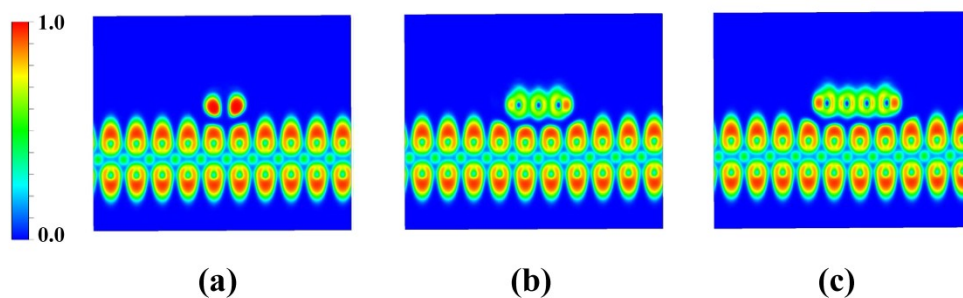

**Figure S10** Electron localization function (ELF) of the (a) C<sub>6</sub>H<sub>6</sub>-MoS<sub>2</sub>, (b) C<sub>24</sub>H<sub>12</sub>-MoS<sub>2</sub> and (c) C<sub>32</sub>H<sub>14</sub>-MoS<sub>2</sub> along with scaling factor (0–1).

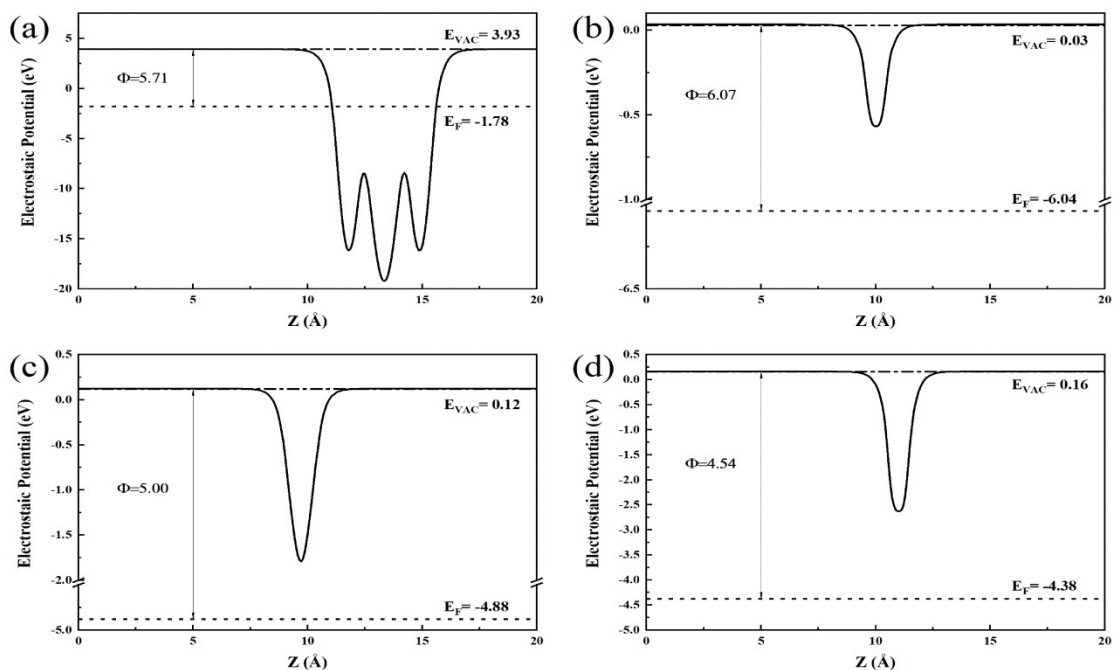

**Figure S11** Work function of (a) MoS<sub>2</sub>, (b) C<sub>6</sub>H<sub>6</sub>, (c) C<sub>24</sub>H<sub>12</sub>, and (d) C<sub>32</sub>H<sub>14</sub>.

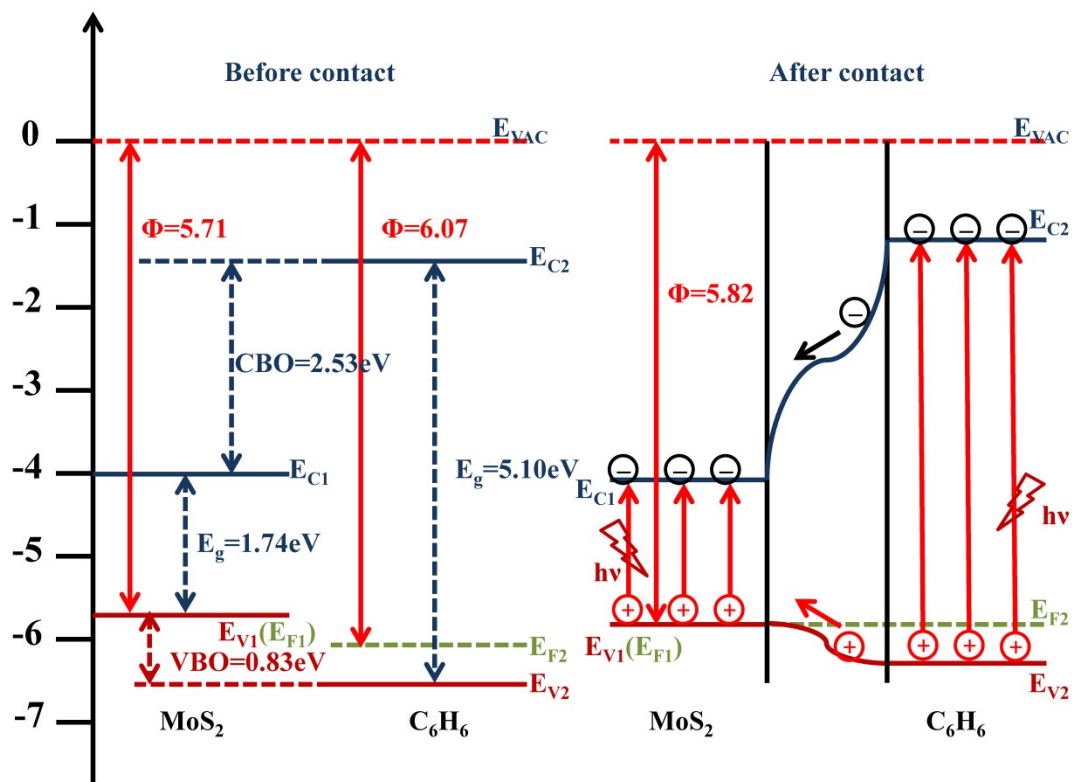

**Figure S12** Diagram of the band edge positions before and after contact of MoS<sub>2</sub> and C<sub>6</sub>H<sub>6</sub>; CBO is the conduction band offset, VBO is the valence band offset,  $E_{VAC}$  is the vacuum level,  $E_C$  is the bottom of the conduction band,  $E_V$  is the top of the valence band,  $E_g$  is the band gap, and  $E_{F1}$  and  $E_{F2}$  are the Fermi levels of MoS<sub>2</sub> and C<sub>6</sub>H<sub>6</sub>, respectively.

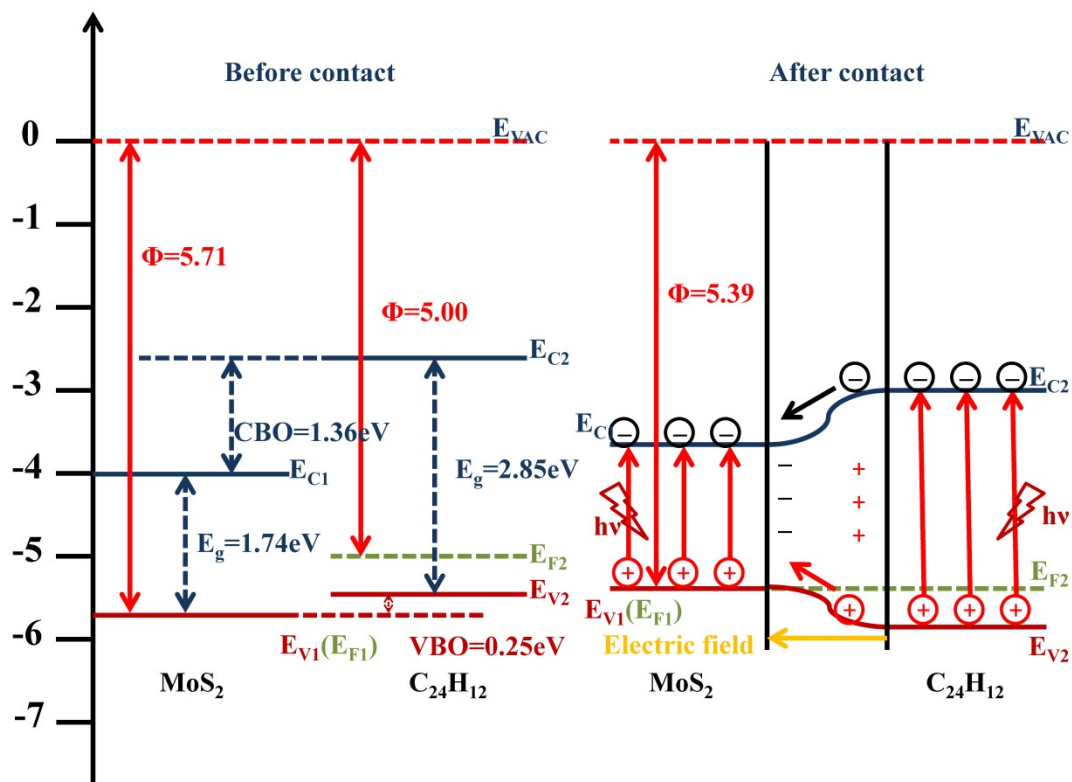

**Figure S13** Diagram of the band edge positions before and after contact of MoS<sub>2</sub> and C<sub>24</sub>H<sub>12</sub>; CBO is the conduction band offset, VBO is the valence band offset, E<sub>VAC</sub> is the vacuum level, E<sub>C</sub> is the bottom of the conduction band, E<sub>V</sub> is the top of the valence band, E<sub>g</sub> is the band gap, and E<sub>F1</sub> and E<sub>F2</sub> are the Fermi levels of MoS<sub>2</sub> and C<sub>24</sub>H<sub>12</sub>, respectively.



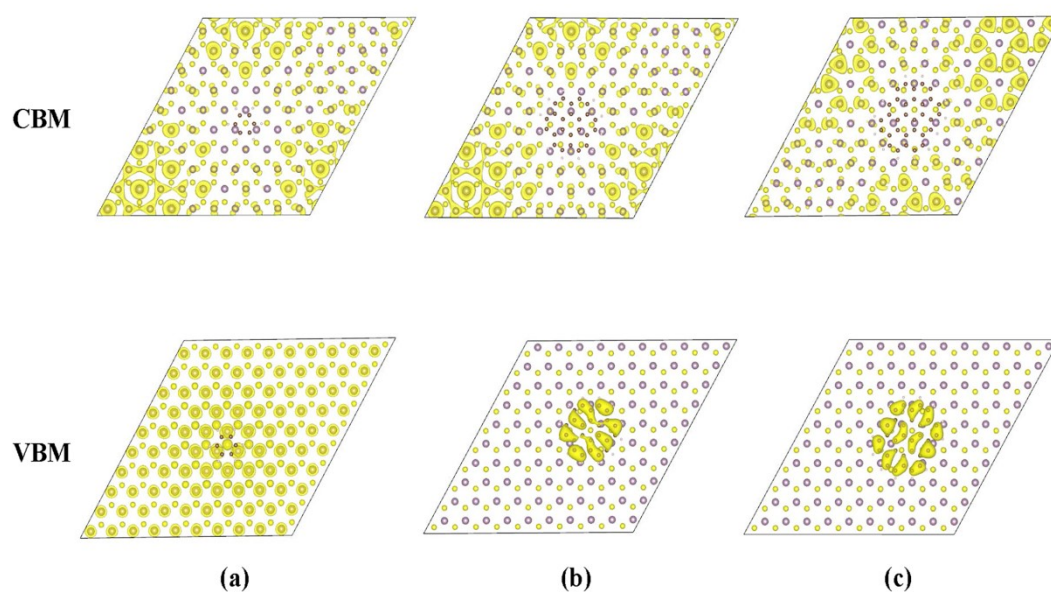

**Figure S14** The partial charge densities (top view) of the CBM (upper) and VBM (bottom) for (a)  $C_6H_6-MoS_2$ , (b)  $C_{24}H_{12}-MoS_2$  and (c)  $C_{32}H_{14}-MoS_2$ .

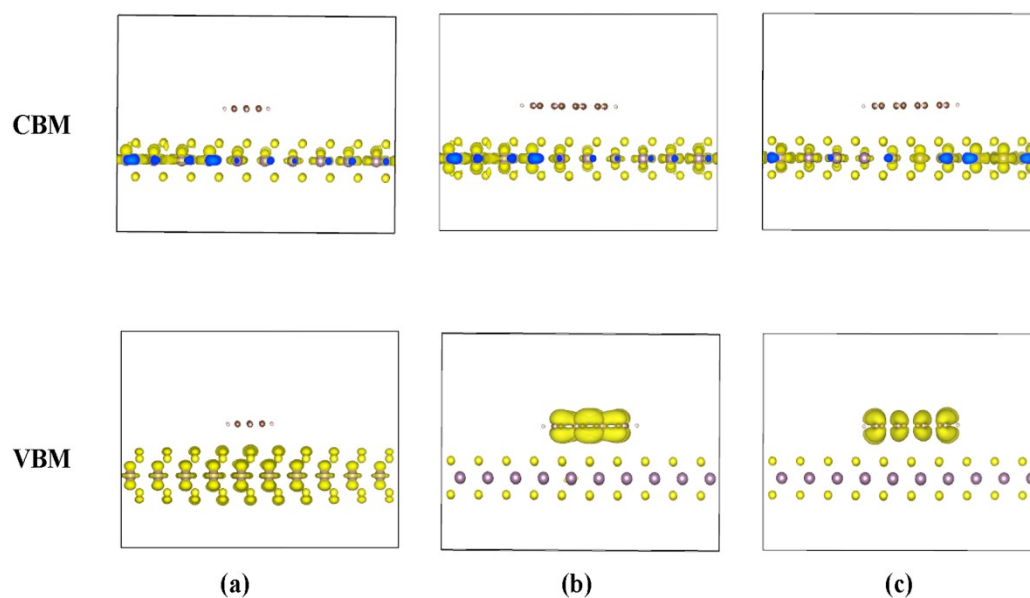

**Figure S15** The partial charge densities (side view) of the CBM (upper) and VBM (bottom) for (a)  $C_6H_6-MoS_2$ , (b)  $C_{24}H_{12}-MoS_2$  and (c)  $C_{32}H_{14}-MoS_2$ .

As shown in Figure S14-15, the VBMs of  $C_{24}H_{12}-MoS_2$  and  $C_{32}H_{14}-MoS_2$  are both contributed by GQDs and the CBMs of  $C_{24}H_{12}-MoS_2$  and  $C_{32}H_{14}-MoS_2$  are both contributed by  $MoS_2$ . So their excited state can have charge-transfer (CT) character. As for  $C_6H_6-MoS_2$ , the electronic densities of the VBM and the CBM are both primarily localized on  $MoS_2$ , which indicate  $C_6H_6-MoS_2$  has locally excited (LE) character.

**Table S1** Binding energy, Binding energy per atom and distance of heterojunctions. A-U represent configurations of S3-S9 from top to bottom orderly.

| Configuration  | Energy (eV) | Binding energy (eV) | d(Å)  |
|----------------|-------------|---------------------|-------|
| $MoS_2$        | -2234.603   |                     |       |
| $C_6H_6$       | -76.107     |                     |       |
| $C_{24}H_{12}$ | -262.969    |                     |       |
| $C_{32}H_{14}$ | -343.611    |                     |       |
| A              | -2311.259   | -0.549              | 3.206 |
| B              | -2311.183   | -0.473              | 3.346 |
| C              | -2311.229   | -0.519              | 3.273 |
| D              | -2499.218   | -1.646              | 3.309 |
| E              | -2499.211   | -1.639              | 3.305 |
| F              | -2499.215   | -1.643              | 3.304 |
| G              | -2499.271   | -1.699              | 3.268 |
| H              | -2499.182   | -1.610              | 3.334 |
| I              | -2499.238   | -1.666              | 3.309 |
| J              | -2580.343   | -2.129              | 3.307 |
| K              | -2580.329   | -2.115              | 3.322 |
| L              | -2580.345   | -2.131              | 3.325 |
| M              | -2580.367   | -2.153              | 3.299 |
| N              | -2580.333   | -2.119              | 3.339 |
| O              | -2580.321   | -2.107              | 3.340 |
| P              | -2580.340   | -2.126              | 3.323 |
| Q              | -2580.344   | -2.130              | 3.335 |
| R              | -2580.330   | -2.116              | 3.322 |
| S              | -2580.340   | -2.126              | 3.329 |
| T              | -2580.330   | -2.116              | 3.341 |
| U              | -2580.364   | -2.150              | 3.330 |

Here, “d” is the difference between average positions along the z-axis of S atoms in the upper layer and the centroids of GQDs as shown in Figure S3. Configuration A, G and M are C<sub>6</sub>H<sub>6</sub>-MoS<sub>2</sub>, C<sub>24</sub>H<sub>12</sub>-MoS<sub>2</sub> and C<sub>32</sub>H<sub>14</sub>-MoS<sub>2</sub> in the main body, respectively.

**Table S2** Bader charge analysis of C<sub>6</sub>H<sub>6</sub>-MoS<sub>2</sub>, C<sub>24</sub>H<sub>12</sub>-MoS<sub>2</sub> and C<sub>32</sub>H<sub>14</sub>-MoS<sub>2</sub>.

|                                                   | Charge Transfer (e) |       |
|---------------------------------------------------|---------------------|-------|
|                                                   | MoS <sub>2</sub>    | GQDs  |
| C <sub>6</sub> H <sub>6</sub> -MoS <sub>2</sub>   | +0.03               | -0.03 |
| C <sub>24</sub> H <sub>12</sub> -MoS <sub>2</sub> | +0.07               | -0.07 |
| C <sub>32</sub> H <sub>14</sub> -MoS <sub>2</sub> | +0.08               | -0.08 |

Here, the charge transfer value can be calculated based on the Bader charge<sup>3-6</sup> and it means the amount of charge which MoS<sub>2</sub> or GQDs gained (+) or lost (-) in the process of forming a heterojunction.

**Table S3** Work function (eV) of MoS<sub>2</sub>, C<sub>6</sub>H<sub>6</sub>, C<sub>24</sub>H<sub>12</sub> and C<sub>32</sub>H<sub>14</sub>.

|                                 | This work | Calculated values |
|---------------------------------|-----------|-------------------|
| MoS <sub>2</sub>                | 5.71      | 5.88 <sup>7</sup> |
| C <sub>6</sub> H <sub>6</sub>   | 6.07      |                   |
| C <sub>24</sub> H <sub>12</sub> | 5.00      | 5.29 <sup>8</sup> |
| C <sub>32</sub> H <sub>14</sub> | 4.54      |                   |

**Table S4.** VBM and CBM relative to the absolute vacuum scale (AVS) (eV) before and after contact.

|                                                     | Before contact |       | After contact |       |
|-----------------------------------------------------|----------------|-------|---------------|-------|
|                                                     | VBM            | CBM   | VBM           | CBM   |
| <b>C<sub>6</sub>H<sub>6</sub>-MoS<sub>2</sub></b>   |                |       |               |       |
| C <sub>6</sub> H <sub>6</sub>                       | -6.54          | -1.44 | -6.29         | -1.19 |
| MoS <sub>2</sub>                                    | -5.71          | -3.97 | -5.82         | -4.08 |
| <b>C<sub>24</sub>H<sub>12</sub>-MoS<sub>2</sub></b> |                |       |               |       |
| C <sub>24</sub> H <sub>12</sub>                     | -5.46          | -2.61 | -5.85         | -3.00 |
| MoS <sub>2</sub>                                    | -5.71          | -3.97 | -5.39         | -3.65 |
| <b>C<sub>32</sub>H<sub>14</sub>-MoS<sub>2</sub></b> |                |       |               |       |
| C <sub>32</sub> H <sub>14</sub>                     | -5.02          | -3.07 | -5.54         | -3.59 |
| MoS <sub>2</sub>                                    | -5.71          | -3.97 | -5.06         | -3.32 |

**Table S5.** VBM and CBM relative to the normal hydrogen electrode scale (NHE) after contact.

|                                                     | NHE scale (eV) |       |
|-----------------------------------------------------|----------------|-------|
|                                                     | VBM            | CBM   |
| <b>C<sub>6</sub>H<sub>6</sub>-MoS<sub>2</sub></b>   |                |       |
| C <sub>6</sub> H <sub>6</sub>                       | 1.79           | -3.31 |
| MoS <sub>2</sub>                                    | 1.32           | -0.42 |
| <b>C<sub>24</sub>H<sub>12</sub>-MoS<sub>2</sub></b> |                |       |
| C <sub>24</sub> H <sub>12</sub>                     | 1.35           | -1.50 |
| MoS <sub>2</sub>                                    | 0.89           | -0.85 |
| <b>C<sub>32</sub>H<sub>14</sub>-MoS<sub>2</sub></b> |                |       |
| C <sub>32</sub> H <sub>14</sub>                     | 1.04           | -0.91 |
| MoS <sub>2</sub>                                    | 0.56           | -1.18 |

1. X. Zheng, J. Xu, K. Yan, H. Wang, Z. Wang and S. Yang, *Chemistry of Materials*, 2014, **26**, 2344-2353.
2. W. Zan, W. Geng, H. Liu and X. Yao, *Journal of Alloys and Compounds*, 2015, **649**, 961-967.
3. Henkelman Group; The University of Texas at Austin, <http://theory.cm.utexas.edu/henkelman/research/bader/>, Accessed November, 2021.
4. R. F. W. Bader, *Chemical Reviews*, 1991, **91**, 893-928.
5. W. Tang, E. Sanville and G. Henkelman, *Journal of Physics: Condensed Matter*, 2009, **21**, 084204.
6. M. Yu and D. R. Trinkle, *The Journal of chemical physics*, 2011, **134**, 064111.
7. D. Pierucci, H. Henck, J. Avila, A. Balan, C. H. Naylor, G. Patriarcho, Y. J. Dappe, M. G. Silly, F. Sirotti, A. T. C. Johnson, M. C. Asensio and A. Ouerghi, *Nano Letters*, 2016, **16**, 4054-4061.
8. L. Cabral, F. P. Sabino, M. P. Lima, G. E. Marques, V. Lopez-Richard and J. L. F. Da Silva, *J. Phys. Chem. C*, 2018, **122**, 18895-18901.
