# Supplementary figures and images for: First-principles calculations of 0D/2D GQDs–MoS2 mixed van der Waals heterojunctions for photocatalysis: a transition from type I to type II
Source: Royal Society of Chemistry journal article supplement (doi:10.1039/d1cp05448a), 2022-01-01

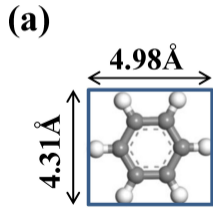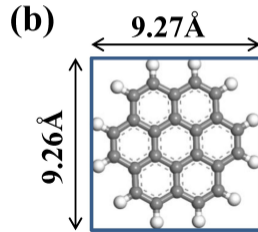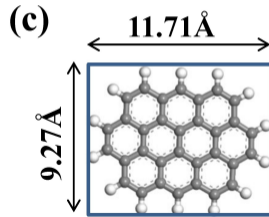

Supplement: d1cp05448a10.pdf [file d1cp05448a10.pdf]

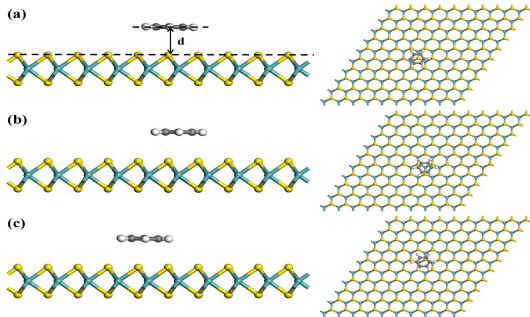

Supplement: d1cp05448a11.pdf [file d1cp05448a11.pdf]

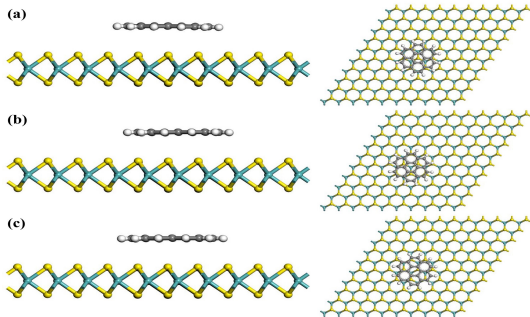

Supplement: d1cp05448a12.pdf [file d1cp05448a12.pdf]

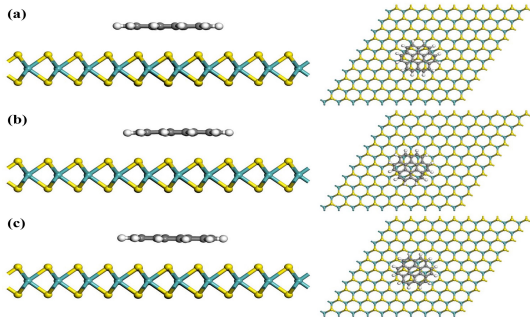

Supplement: d1cp05448a13.pdf [file d1cp05448a13.pdf]

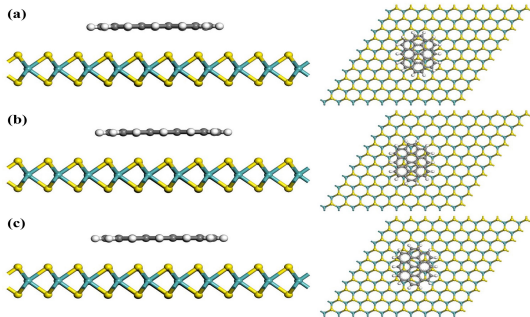

Supplement: d1cp05448a14.pdf [file d1cp05448a14.pdf]

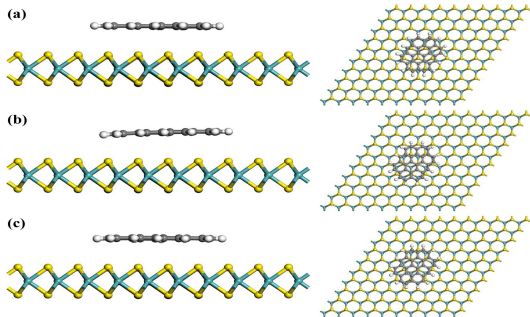

Supplement: d1cp05448a15.pdf [file d1cp05448a15.pdf]

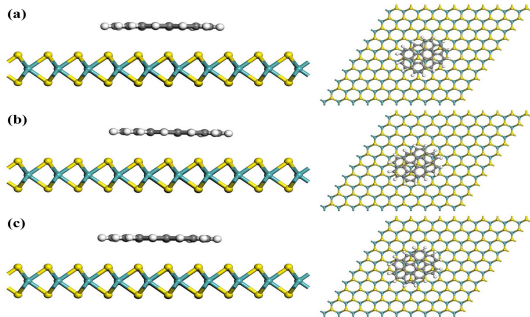

Supplement: d1cp05448a16.pdf [file d1cp05448a16.pdf]

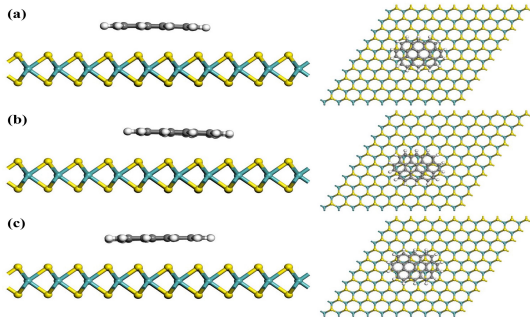

Supplement: d1cp05448a17.pdf [file d1cp05448a17.pdf]

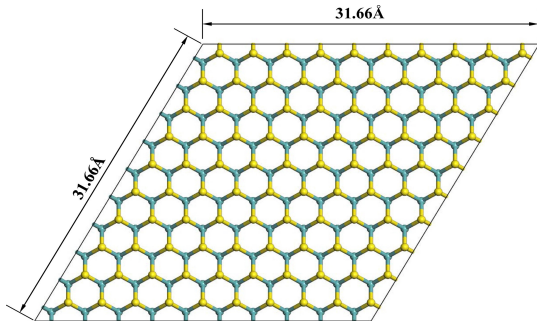

Supplement: d1cp05448a3.pdf [file d1cp05448a3.pdf]

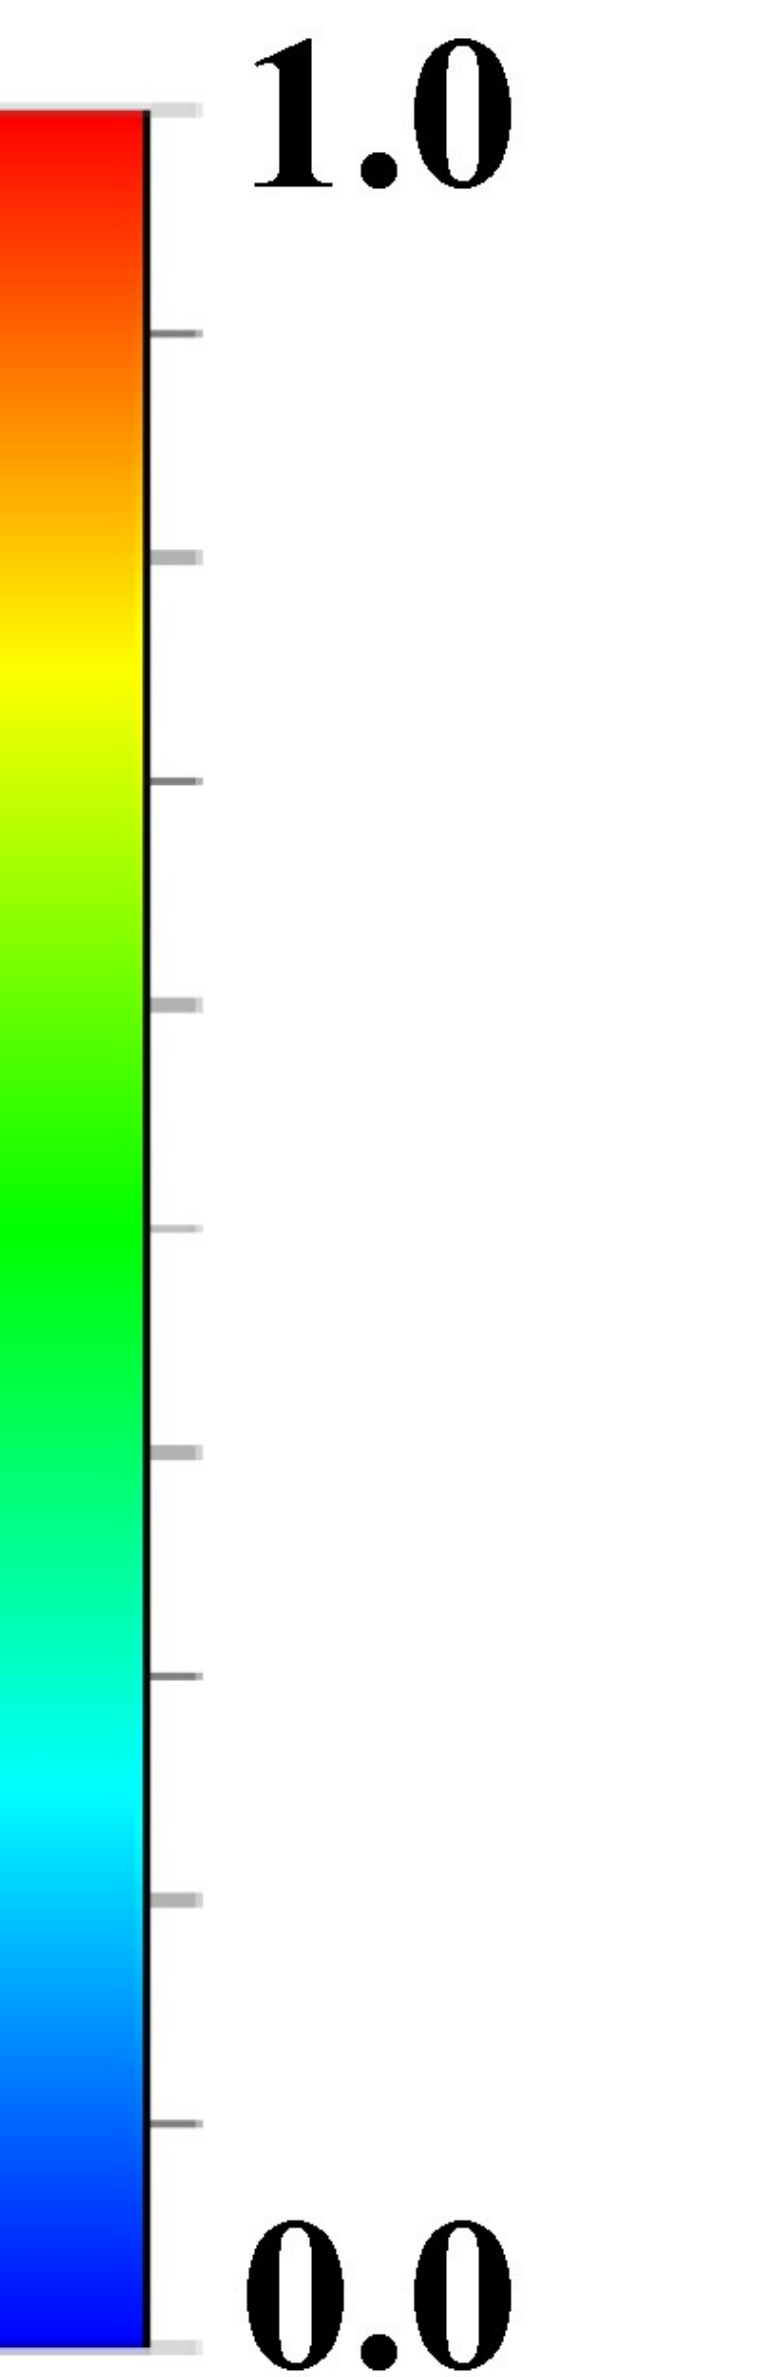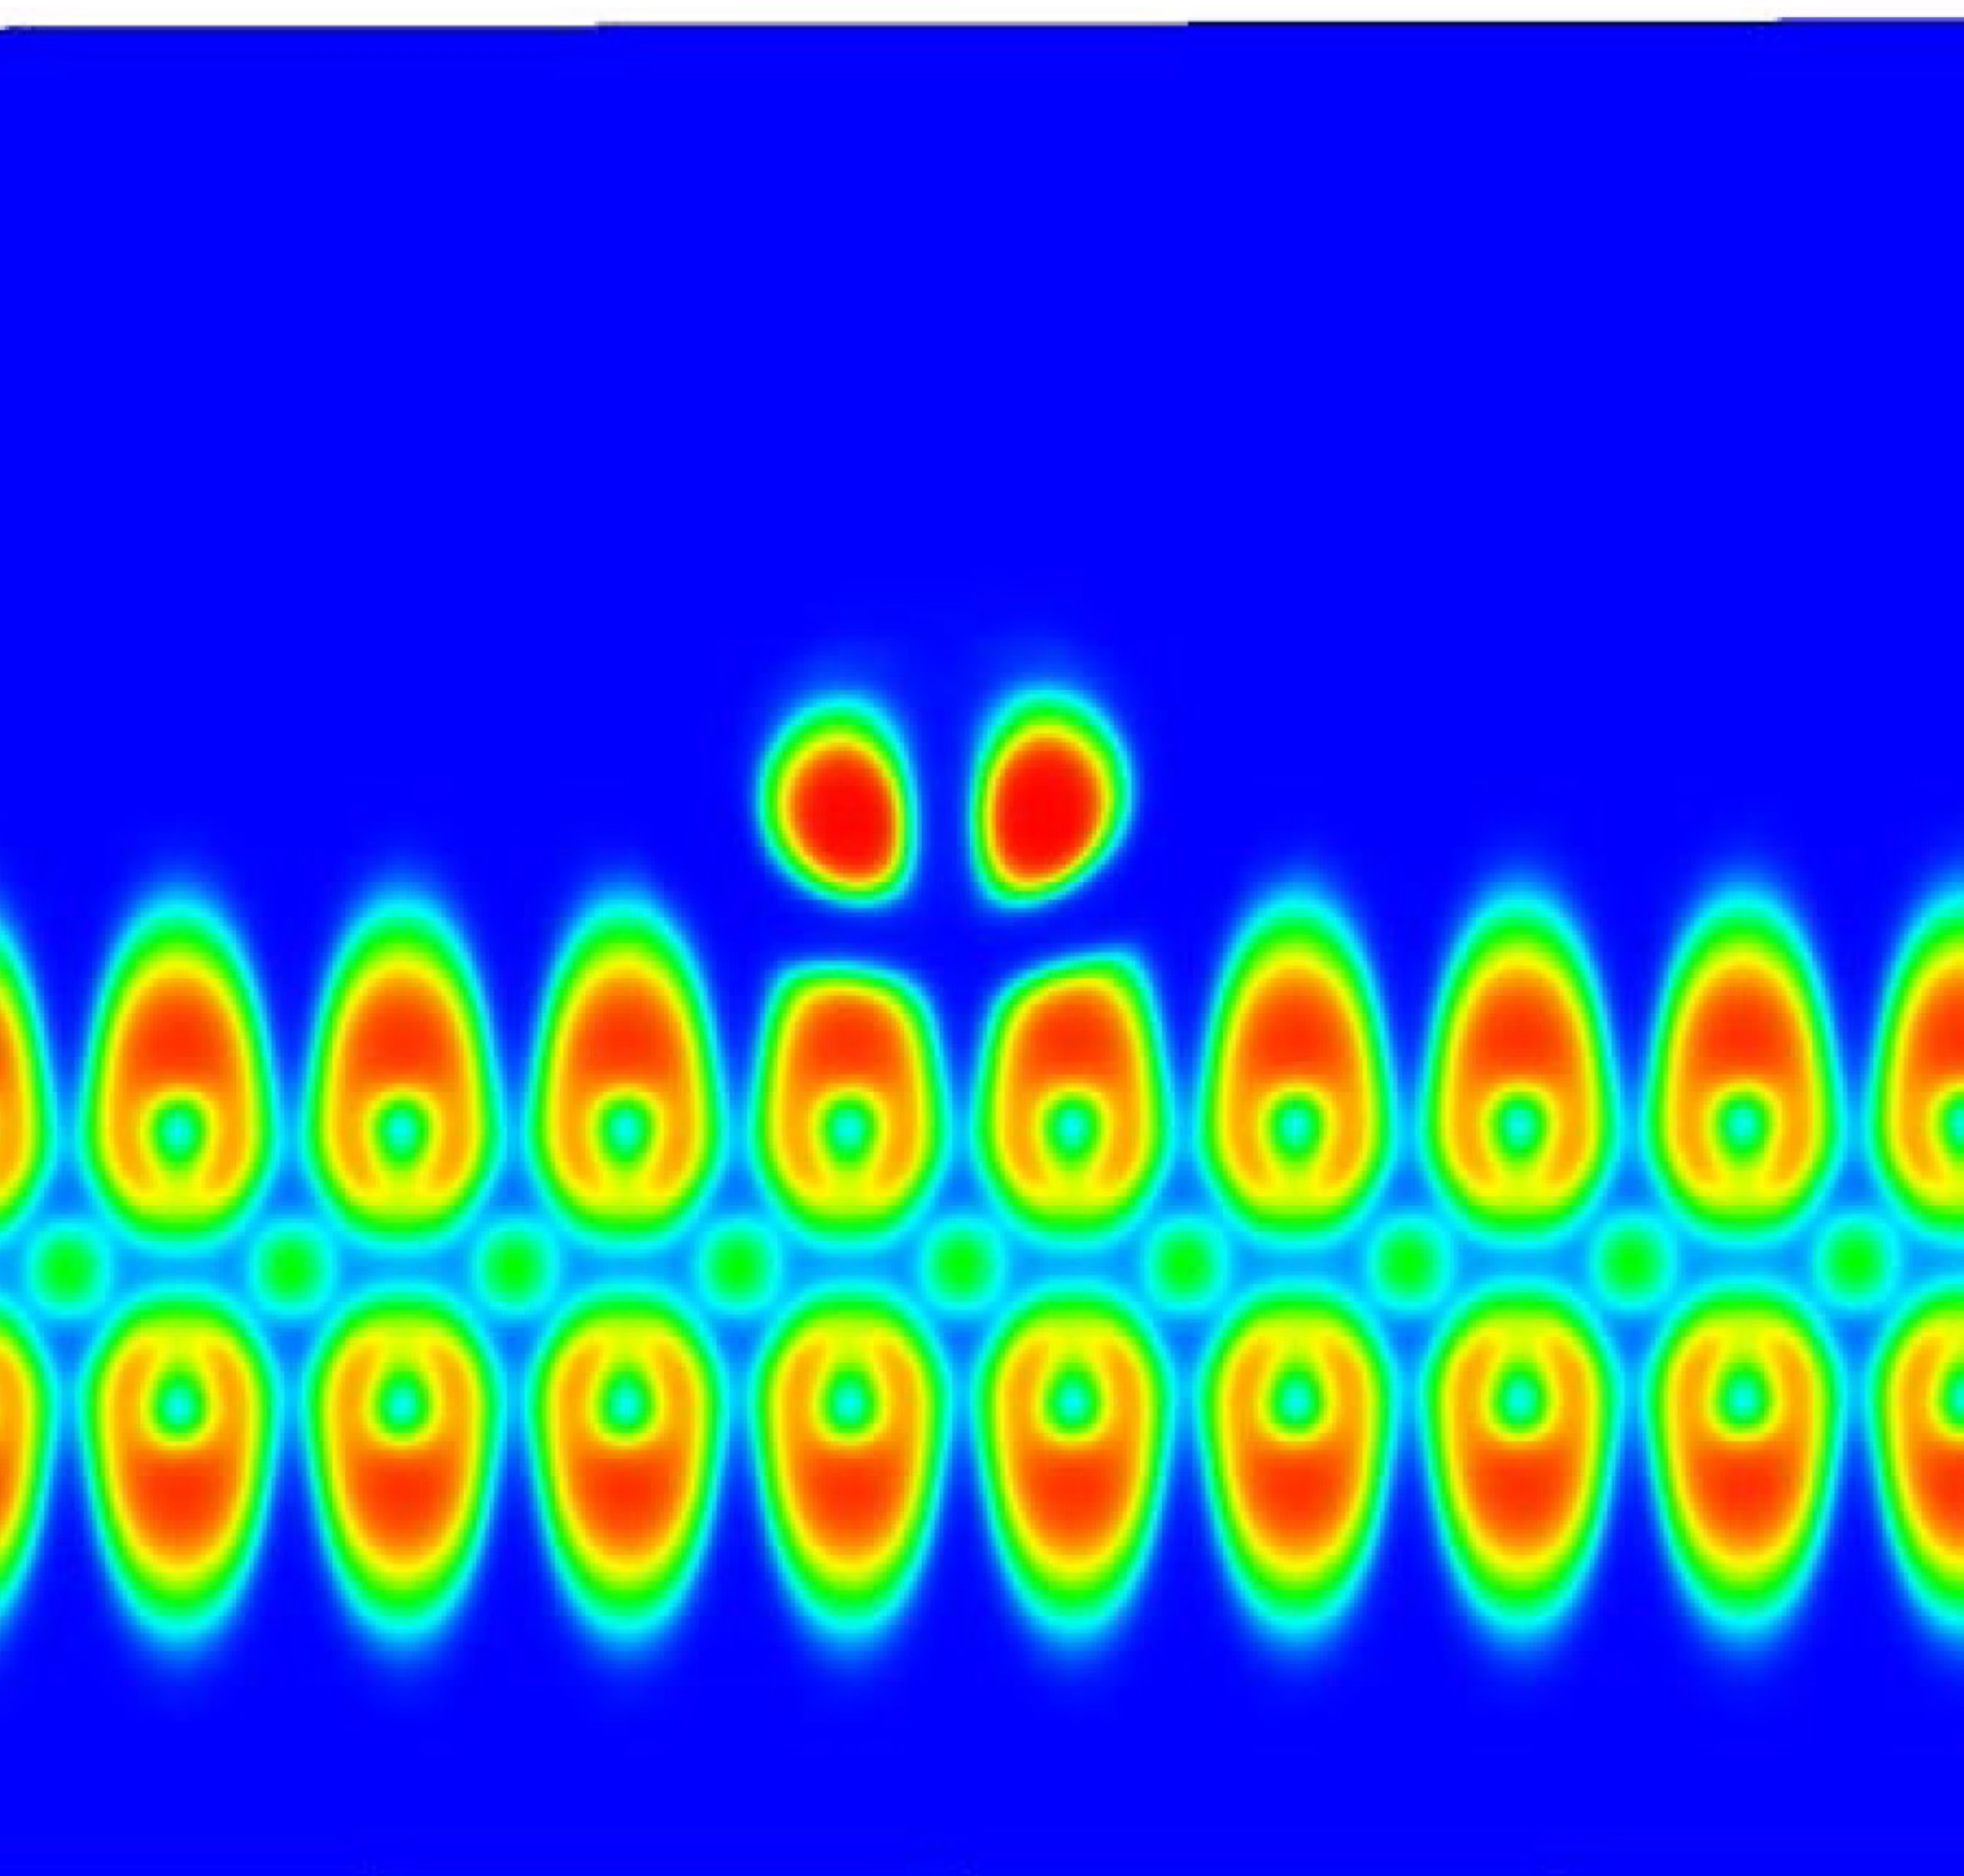

**(a)**

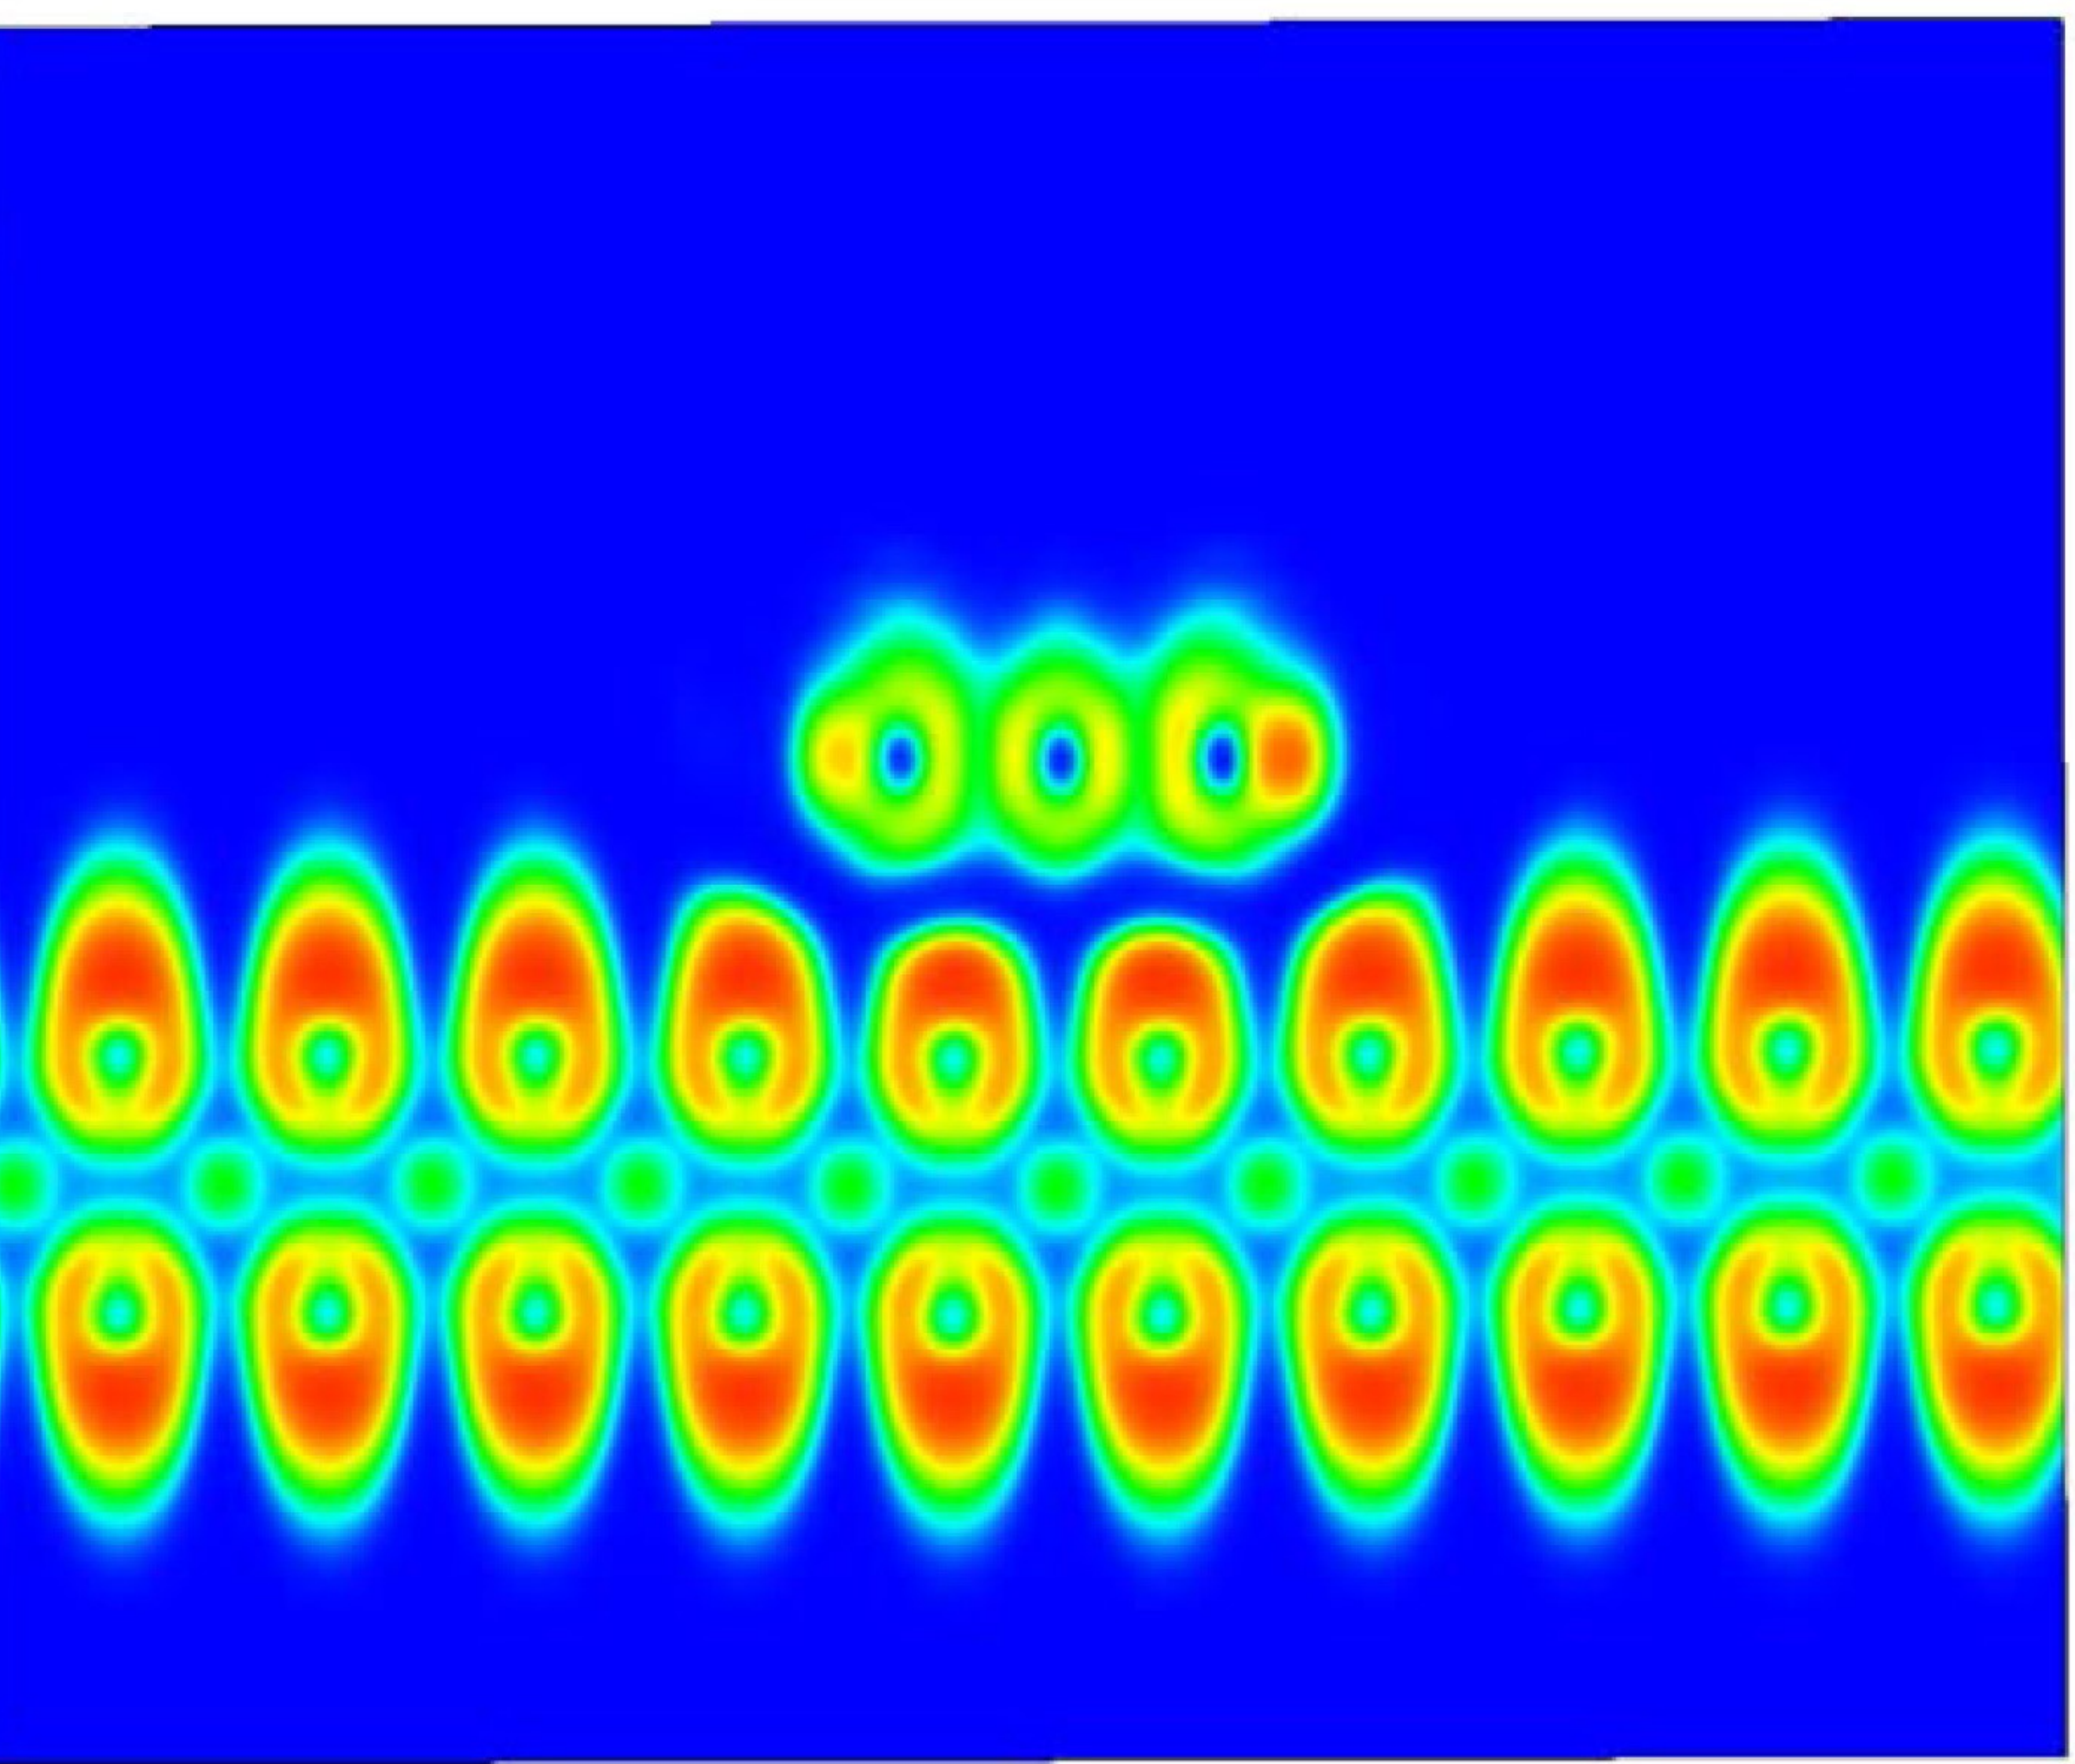

**(b)**

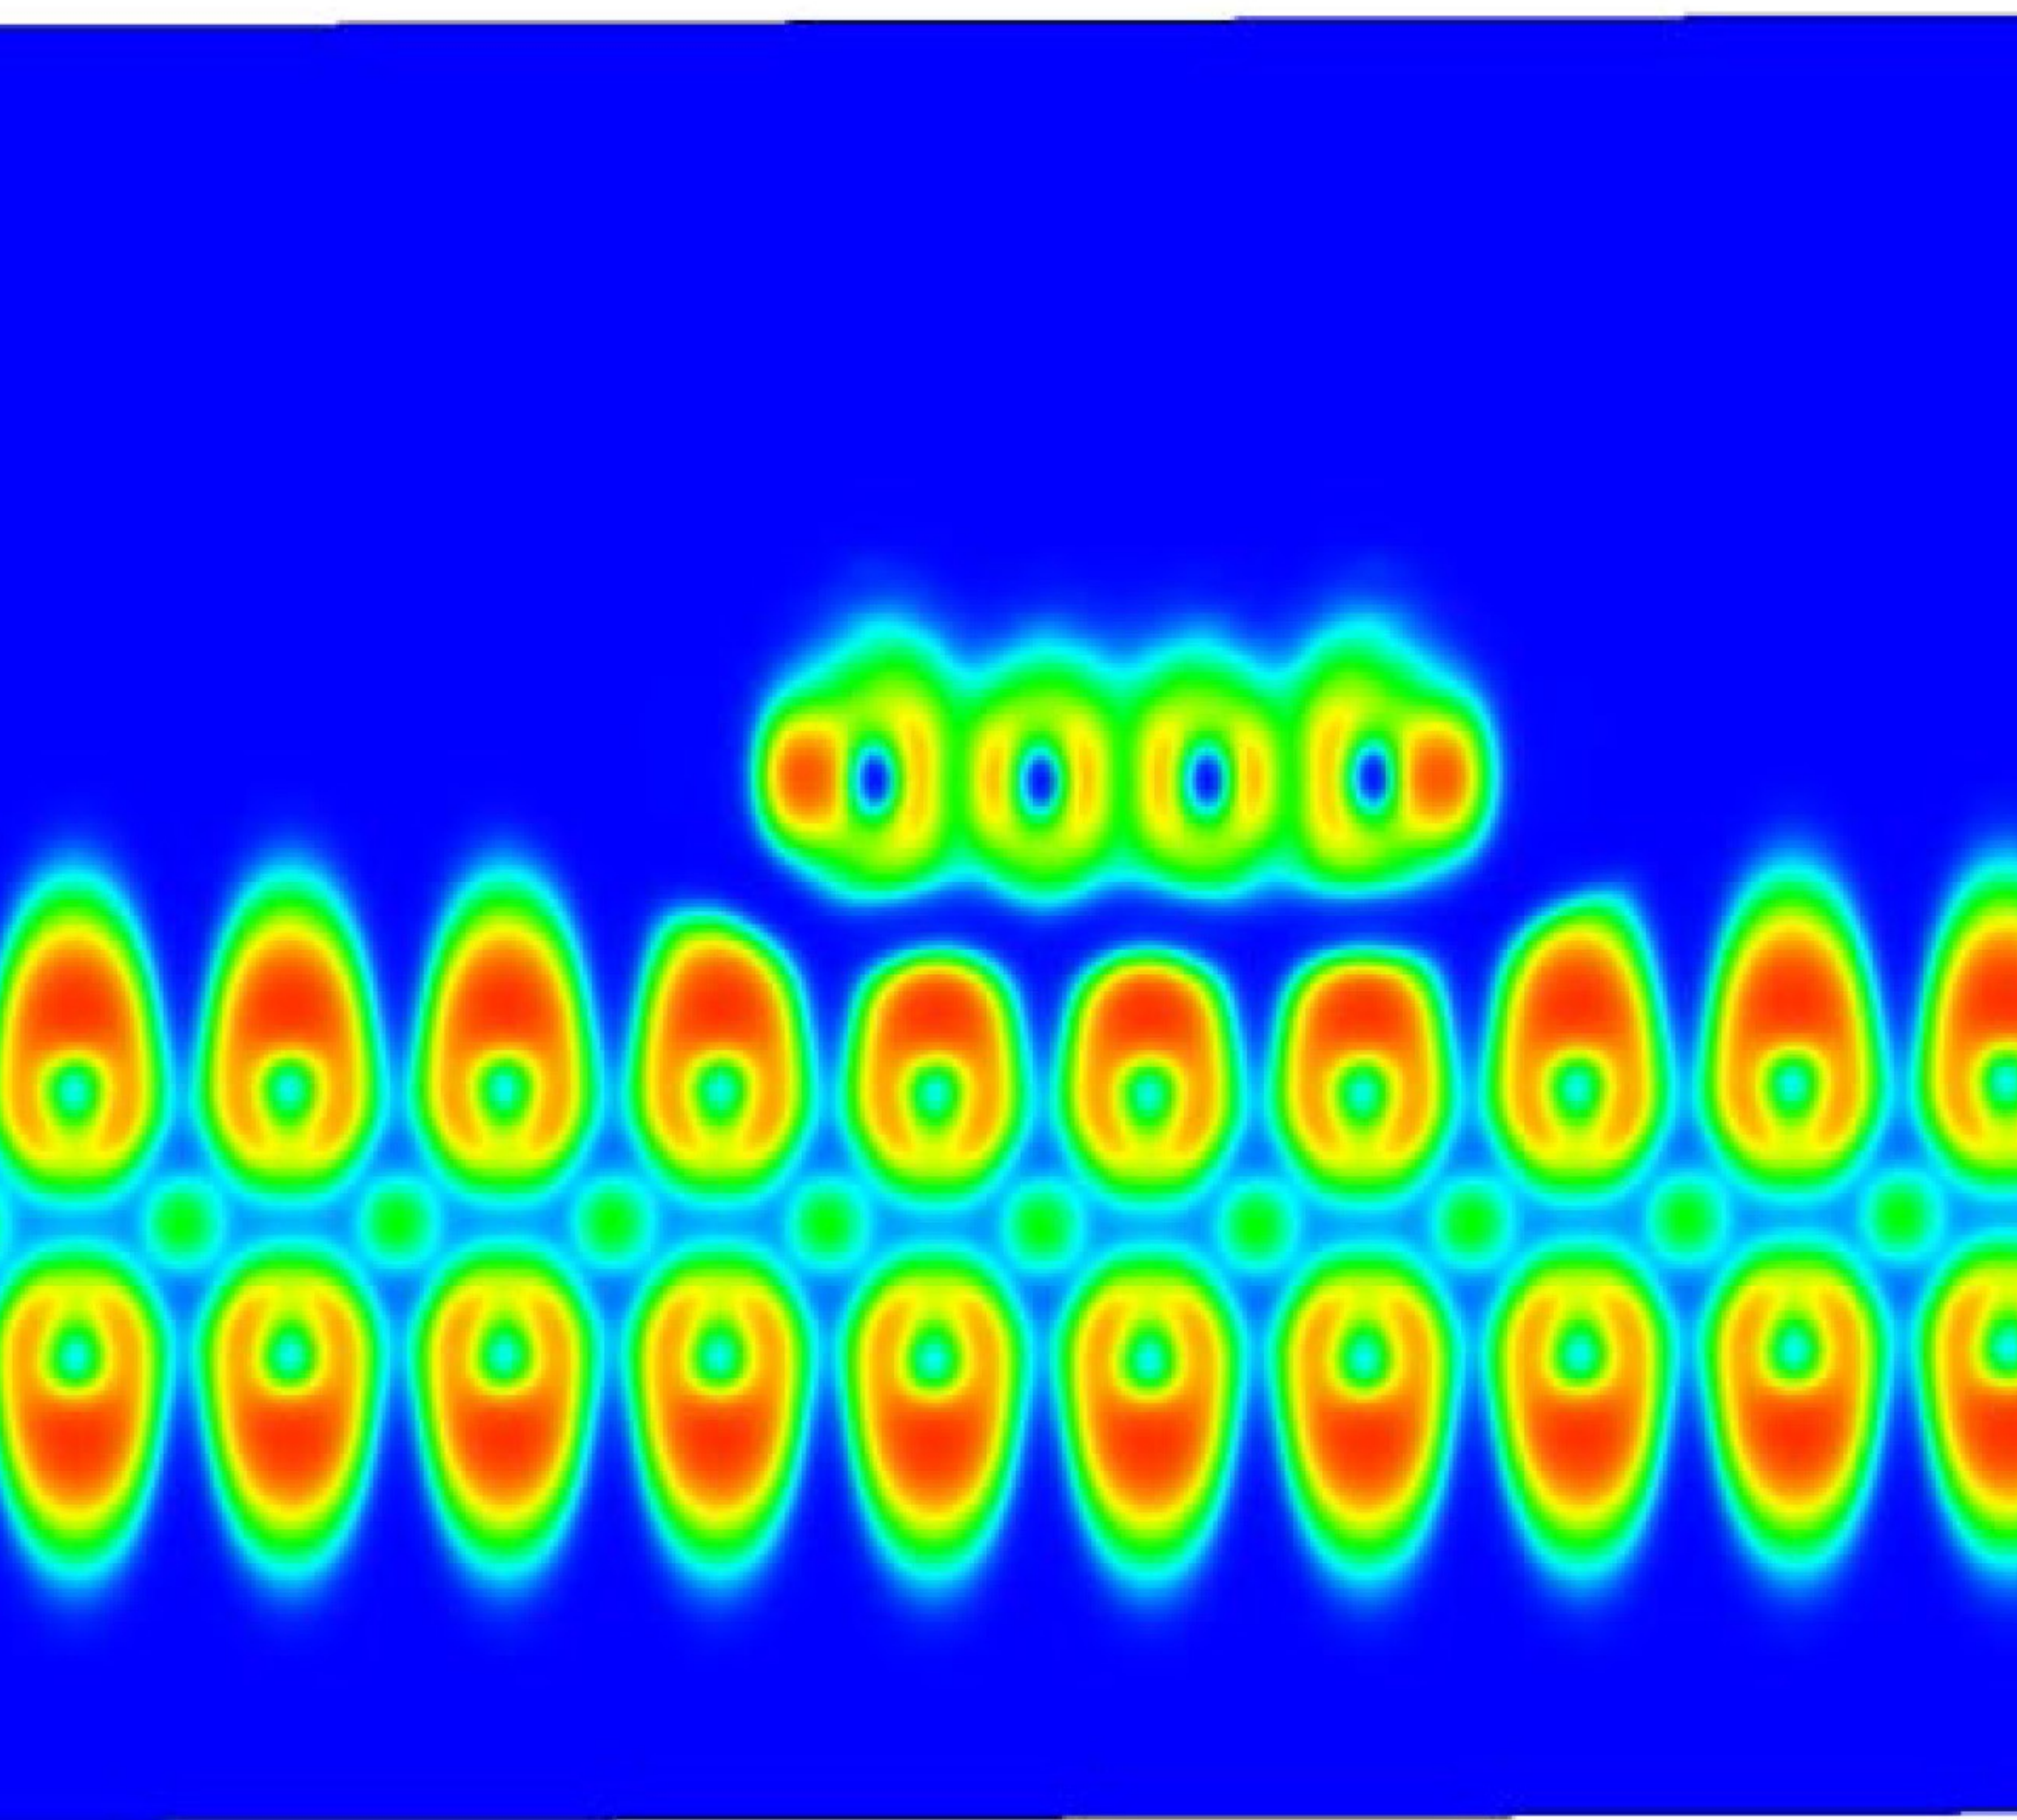

**(c)**

Supplement: d1cp05448a4.pdf [file d1cp05448a4.pdf]

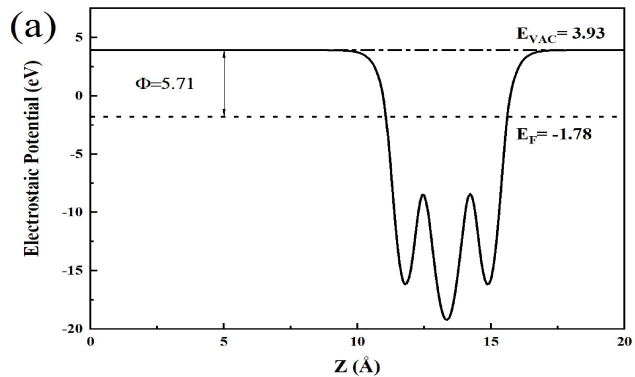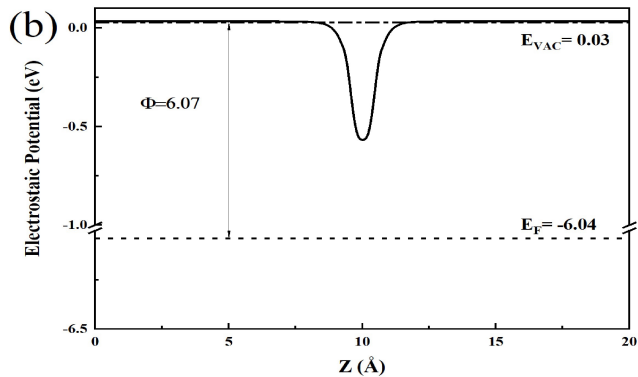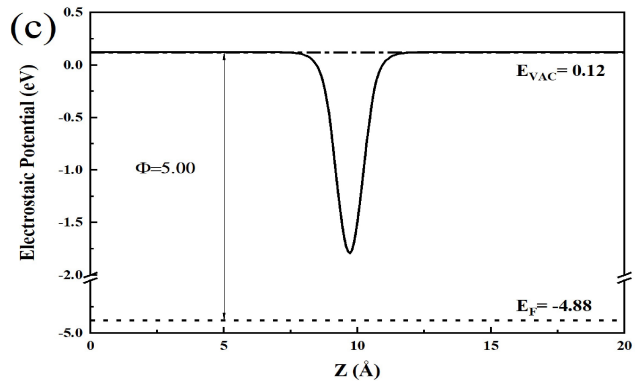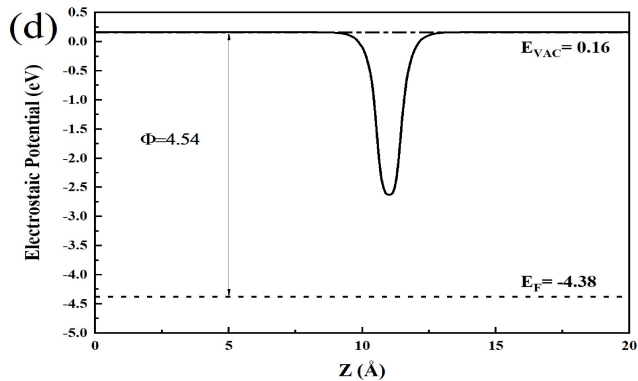

Supplement: d1cp05448a5.pdf [file d1cp05448a5.pdf]

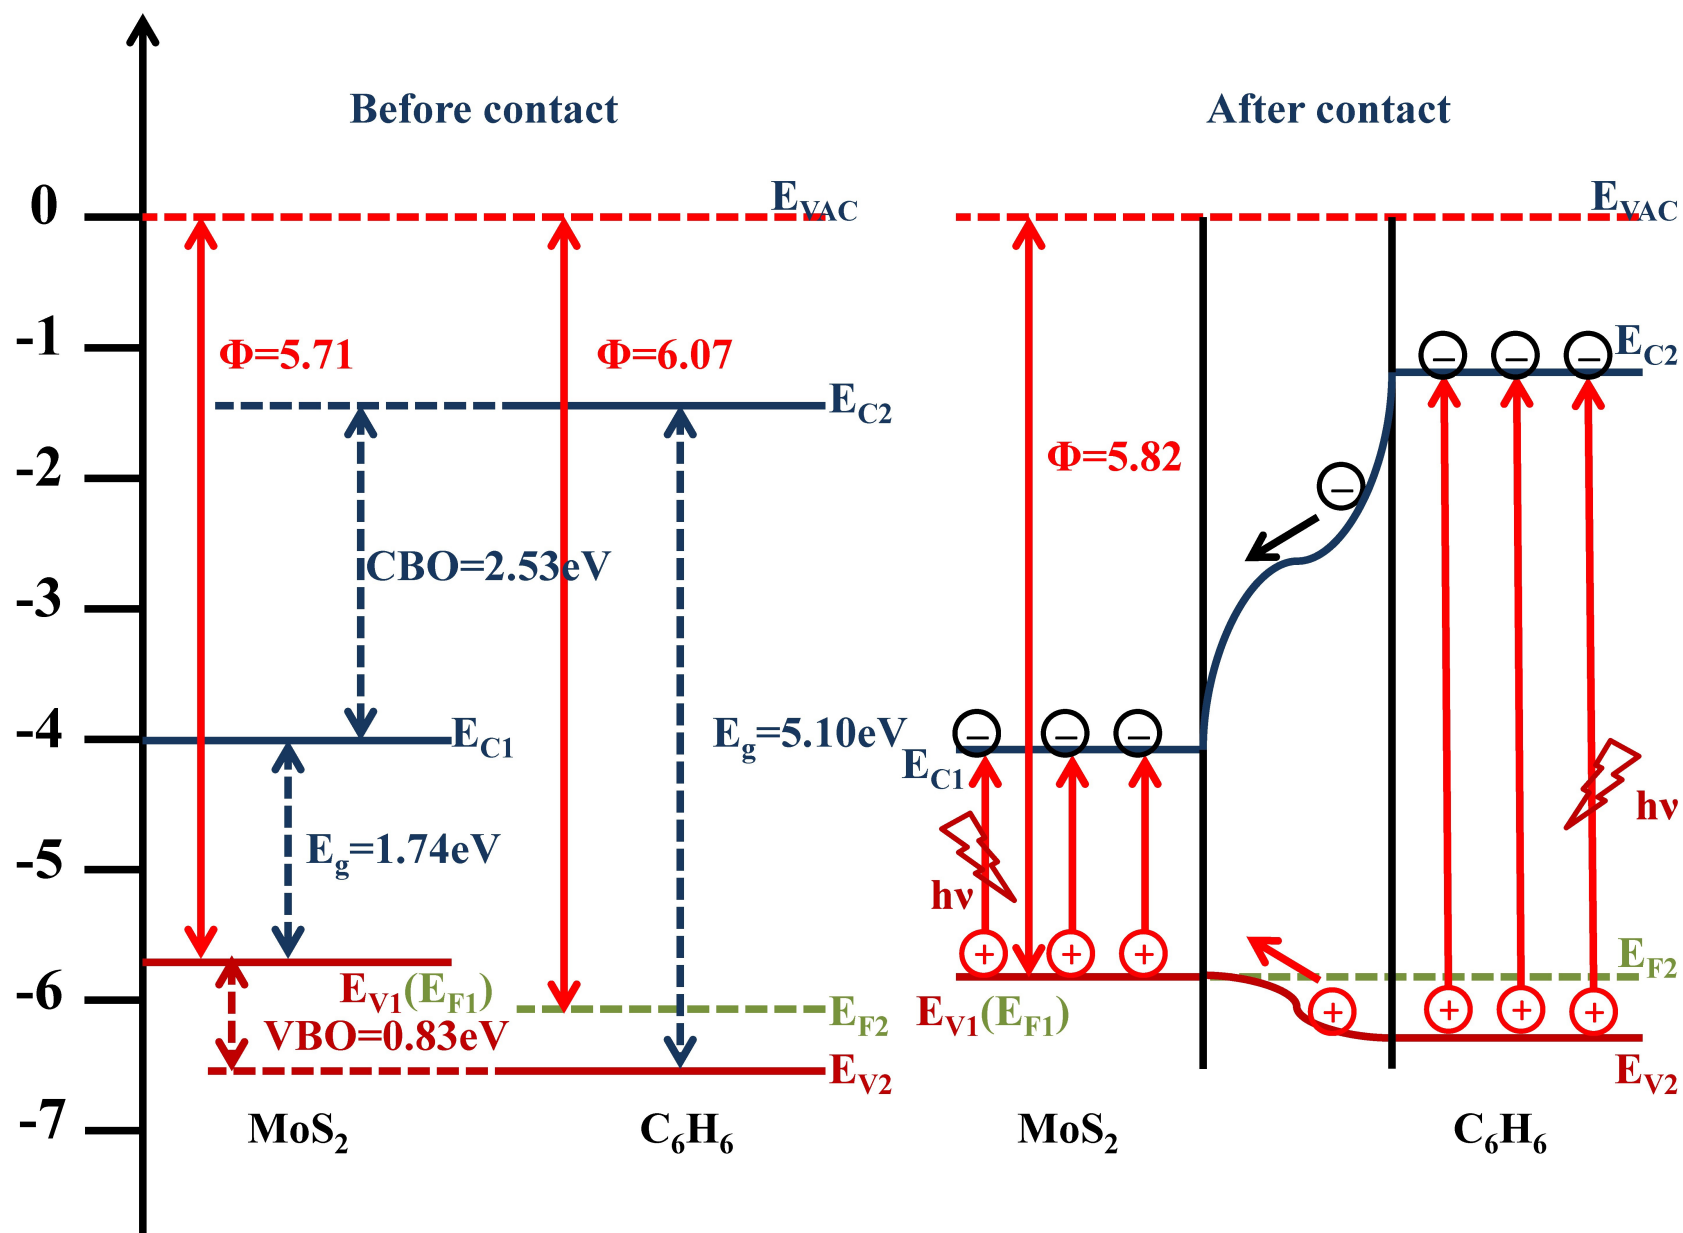

Supplement: d1cp05448a6.pdf [file d1cp05448a6.pdf]

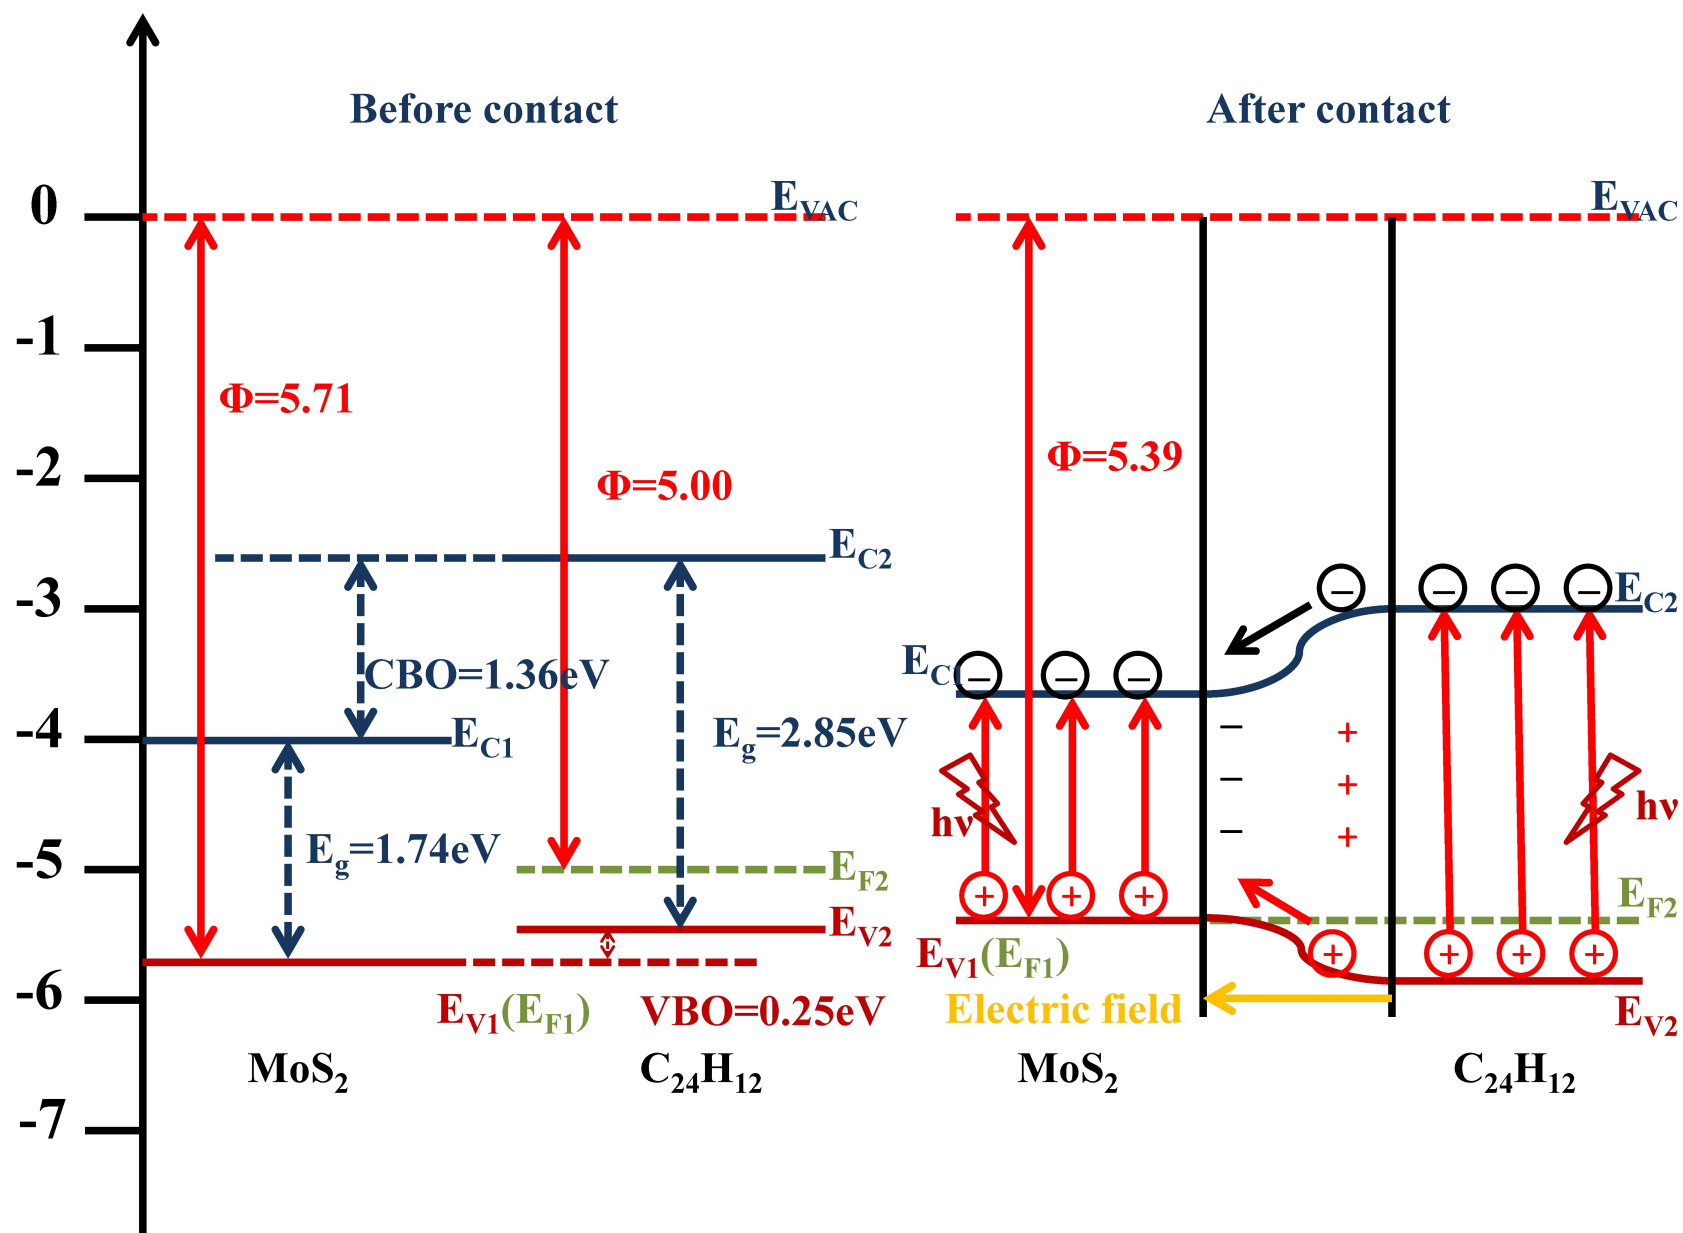

Supplement: d1cp05448a7.pdf [file d1cp05448a7.pdf]

**CBM**

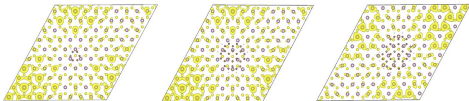

**VBM**

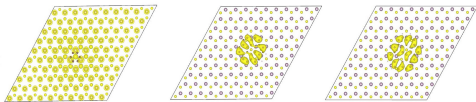

**(a)**

**(b)**

**(c)**

Supplement: d1cp05448a8.pdf [file d1cp05448a8.pdf]

CBM

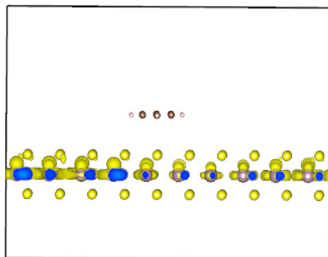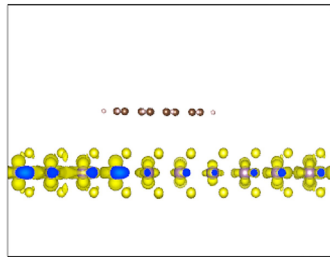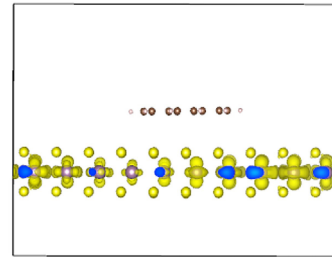

VBM

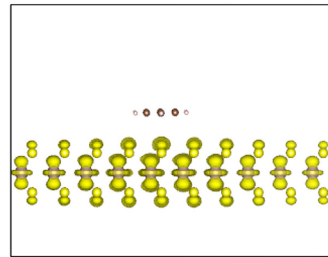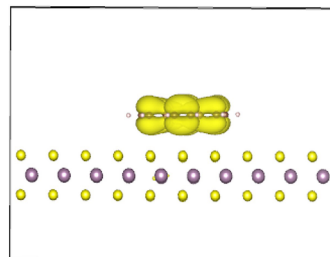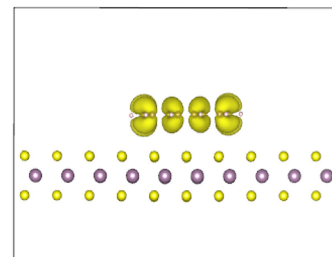

(a)

(b)

(c)

Supplement: d1cp05448a9.pdf [file d1cp05448a9.pdf]
